# THE AMERICAN JOURNAL OF PSYCHIATRY

## En este número

A24

### Perspectivas

#### Editoriales

- 1233 De la banca al asilo para lunáticos**  
Roy H. Perlis
- 1236 Aspectos del neurodesarrollo en la psicopatología multidimensional**  
William G. Iacono
- 1240 Espectroscopía RM-C13 y metabolismo del glutamato en los trastornos del ánimo: Retos actuales, oportunidades potenciales**  
David J. Bond y Kelvin O. Lim
- 1243 2014 en retrospectiva**  
Robert Freedman, David A. Lewis, Robert Michels, Daniel S. Pine, Susan K. Schultz, Carol A. Tamminga, and Misty Richards

#### Comentario

- 1248 Temas del DSM: Incorporación de pruebas biológicas, evitación de la reificación y un enfoque al “problema del callejón sin salida”**  
Kenneth S. Kendler **Audio**

#### Introspección

- 1251 Ampliando la perspectiva**  
Benjamin Brody

#### Conferencia de Caso Clínico

- 1253 Envenenamiento por mercurio: Un caso de una enfermedad neuropsiquiátrica compleja**  
Xuebing Huang, Samuel Law, Dan Li, Xin Yu, y Bing Li **Audio**

#### Imágenes en Psiquiatría

- 1257 Tom de Bedlam**  
Daniel P. Mason

#### Resúmenes y Reseñas

- 1259 Hacia una biofirma para el suicidio**  
María A. Oquendo, Gregory M. Sullivan, Katherin Sudol, Enrique Baca-García, Barbara H. Stanley, M. Elizabeth Sublette, y J. John Mann

## Nuevas Investigaciones

### Artículos

- 1278 Un biomarcador inflamatorio predice un resultado diferencial del tratamiento de la depresión con escitalopram y nortriptilina**  
Rudolf Uher, Katherine E. Tansey, Tracy Dew, Wolfgang Maier, Ole Mors, Joanna Hauser, Mojca Zvezdana Dernovsek, Neven Henigsberg, Daniel Souery, Anne Farmer, y Peter McGuffin  
**Audio EMC Editorial Video**
- 1287 Identificación y réplica de un biomarcador epigenético y genético combinado que predice el suicidio y las conductas suicidas**  
Jerry Guintivano, Tori Brown, Alison Newcomer, Marcus Jones, Olivia Cox, Brion S. Maher, William W. Eaton, Jennifer L. Payne, Holly C. Wilcox, y Zachary A. Kaminsky **Audio EMC Editorial**
- 1297 Resultados clínicos y asociación del genoma completo para un sitio de metilación cerebral en el estudio de farmacogenética de los antidepresivos en mexicano-americanos**  
Ma-Li Wong, Chuanhui Dong, Deborah L. Flores, Monika Ehrhart-Bornstein, Stefan Bornstein, Mauricio Arcos-Burgos, y Julio Licinio **Editorial**
- 1310 Correlatos neurales y cognitivos de la varianza común y específica en los problemas de exteriorización en la adolescencia temprana**  
Natalie Castellanos-Ryan, Maren Struve, Robert Whelan, Tobias Banaschewski, Gareth J. Barker, Arun L.W. Bokde, Uli Bromberg, Christian Büchel, Herta Flor, Mira Fauth-Bühler, Vincent Frouin, Juergen Gallinat, Penny Gowland, Andreas Heinz, Claire Lawrence, Jean-Luc Martinot, Frauke Nees, Tomas Paus, Zdenka Pausova, Marcella Rietschel, Trevor W. Robbins, Michael N. Smolka, Gunter Schumann, Hugh Garavan, Patricia J. Conrod, The IMAGEN Consortium **Editorial**
- 1320 Metabolismo del glutamato en el trastorno depresivo mayor**  
Chadi G. Abdallah, Lihong Jiang, Henk M. De Feyter, Madonna Fasula, John H. Krystal, Douglas L. Rothman, Graeme F. Mason, y Gerard Sanacora  
**EMC Editorial Video**
- 1328 Efectos de la depresión, la ansiedad, la comorbilidad y los antidepresivos en la frecuencia cardíaca en estado de reposo y su variabilidad: Un estudio basal de la cohorte de Brasil del estudio ELSA**  
Andrew H. Kemp, Andre R. Brunoni, Itamar S. Santos, Maria A. Nunes, Eduardo M. Dantas, Roberta Carvalho de Figueiredo, Alexandre C. Pereira, Antonio L.P. Ribeiro, José G. Mill, Rodrigo V. Andreão, Julian F. Thayer, Isabela M. Benseñor, y Paulo A. Lotufo **Audio**

## Comunicados y Actualizaciones

### Cartas al Editor

- 1335 [Brief Versus Intensive Psychosocial Treatments for Bipolar Disorder: Time for Stepped Care? Psychotherapy and Psychiatric Science Ventromedial Syndrome With Normal Cognitive Functioning in Vascular Depression]
- 1338 [Correction]

### Reseñas Bibliográficas

- 1339 [Race, Memory and the Apartheid Archive: Towards a Transformative Psychosocial Praxis Doing Psychoanalysis in Tehran Remnants of a Life on Paper: A Mother and Daughter's Struggle with Borderline Personality Disorder Under the Red Roof: One Hundred Years at Northern State Hospital]

### Otros Temas de Interés

- 1343 [Thank you to Reviewers]
- 1349 Educación Médica Continuada
- A16 Calendario
- A17 Directivos de la American Psychiatric Association
- A21 Contenidos del *British Journal of Psychiatry*
- A22 Contenidos del *Shanghai Archives of Psychiatry*

### Cubierta

[Guintivano et al. (p. 1287) report a DNA signature for increased suicide risk in this issue. Oquendo et al. (p. 1259) survey other markers for suicide, and Kendler (p. 1248) discusses the inclusion of biomarkers in clinical diagnoses. Purple and turquoise ribbons signifying suicide awareness, here altered to include the DNA helix, can be purchased from the National Suicide Prevention Lifeline: <http://www.suicidepreventionlifeline.org/getinvolved/awarenessribbons.aspx>. Cover design by Susan Westrate.]

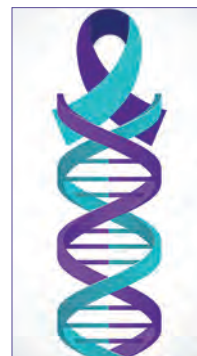

#### Audio

artículo en AJP Audio: archivo .mp3 descargable de [ajp.psychiatryonline.org](http://ajp.psychiatryonline.org)

#### Guías clínicas

este artículo ofrece guías clínicas (ver página "En este Número" o al final del artículo)

#### EMC

existe un curso en línea que cubre los contenidos de este artículo para los suscriptores del programa de cursos de EMC del AJP

#### Editorial

este artículo se discute en uno de los editoriales de este número

La Tabla de Contenidos de Este Número Está Disponible en Español  
(This issue's Table of Contents is available in Spanish)

Presented in collaboration with the Office of Global Health, Rutgers-Robert Wood Johnson Medical School

Translation courtesy of

Sergi Casals, M.A.

Garuna, Medellin, Colombia ([www.garunaeditors.com](http://www.garunaeditors.com))

Carlos Lopez Jaramillo, M.D.

Universidad de Antioquia, Medellin, Colombia

Javier I. Escobar, M.D., M.Sc.

Rutgers-Robert Wood Johnson Medical School

Consulte *The American Journal of Psychiatry* en línea en [ajp.psychiatryonline.org](http://ajp.psychiatryonline.org)

**NEW**

Also Included: Translations of selected abstracts!  
(Support for this effort provided by AstraZeneca-Colombia.)

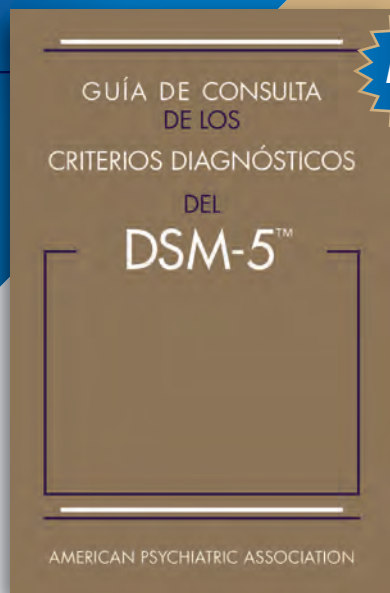

**Nuevo!**

## **Guía de consulta de los criterios diagnósticos del DSM-5™**

**Spanish Edition of the Desk Reference to the Diagnostic Criteria From DSM-5™**

American Psychiatric Association

La Guía de consulta de los criterios diagnósticos del DSM-5™ es una ayuda concisa y asequible para la referencia psiquiátrica fundamental, el DSM-5™. Incluye la clasificación diagnóstica completa revisada, así como todos los criterios diagnósticos del DSM-5™ en un formato fácil de utilizar. Esta cómoda referencia proporciona un acceso rápido a la información esencial para emitir un diagnóstico. Diseñado como complemento del DSM-5™, esta cómoda guía ayudará a los profesionales de la salud mental a incorporar los criterios diagnósticos del DSM-5™ en sus diagnósticos.

El Manual diagnóstico y estadístico de los trastornos mentales es la máxima referencia autorizada para la práctica clínica en el campo de la salud mental. Los cambios estructurales y diagnósticos de la quinta edición son un material que todos los clínicos "deben conocer". La Guía de consulta de los criterios diagnósticos del DSM-5™ condensa la información diagnóstica actualizada esencial de este manual para ofrecer a los clínicos un recurso inestimable para diagnosticar con eficacia los trastornos mentales, desde el de mayor prevalencia al menos frecuente.

2014 • 490 pages • ISBN 978-0-89042-551-0 • Paperback • \$69.00 • Item #2551

*También disponible en Español*

### **Aplicación para celular de los Criterios Diagnósticos del DSM-5™**

La Aplicación Móvil de Criterios Diagnósticos DSM-5™ proporciona a los profesionales, investigadores y estudiantes de la salud mental un rápido acceso a códigos y criterios vitales de DSM para que puedan integrar por completo los nuevos datos en su práctica y sus estudios. Los usuarios tienen acceso completo fuera de línea a todos los conjuntos de criterios, además de acceso en línea a vídeos, comentarios y recursos de apoyo. Sus poderosas herramientas de personalización y de búsqueda ayudan y mejoran la valoración de las presentaciones de los síntomas en diversos entornos clínicos y administrativos.

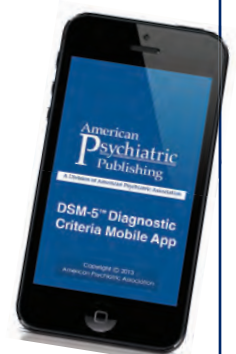

Ahora disponible para dispositivos iOS y Android.

### Hacia a una biofirma para el suicidio

Maria A. Oquendo, M.D.  
Gregory M. Sullivan, M.D.  
Katherin Sudol, B.A.  
Enrique Baca-García, M.D., Ph.D.  
Barbara H. Stanley, Ph.D.  
M. Elizabeth Sublette, M.D., Ph.D.  
J. John Mann, M.D.

**Objetivo:** El suicidio, una causa importante de muerte en el mundo, tiene claros fundamentos biológicos. Los autores revisan y sintetizan la literatura científica sobre los biomarcadores del suicidio con el objetivo de utilizar estos hallazgos para desarrollar un modelo coherente de diátesis para el suicidio.

**Método:** Los autores examinaron estudios que cubren una amplia gama de sistemas neurobiológicos implicados en el suicidio. Ofrecen descripciones sucintas de cada sistema para presentar un contexto en el que se pueda interpretar el significado de los hallazgos en suicidio.

**Resultados:** Varios estudios implican una desregulación en los sistemas de respuesta al estrés, especialmente en el eje hipotalámico-pituitario-adrenal, como una diátesis para el suicidio. Hallazgos adicionales relacionados con los índices neuroinflamatorios, la función glutamatérgica y la plasticidad neuronal a nivel celular y de circuitos pueden reflejar efectos posteriores de una des-

regulación de este tipo. Queda por resolver si las anomalías serotoninérgicas observadas en personas que han muerto por suicidio son independientes de las anomalías en la respuesta al estrés.

**Conclusiones:** Los marcadores más contundentes del suicidio están relacionados con las respuestas alteradas al estrés y sus efectos posteriores, y con anomalías en el sistema serotoninérgico. Estudiar estos sistemas en paralelo y en las mismas poblaciones puede contribuir a dilucidar el papel de cada sistema y su interacción, posiblemente conduciendo a la identificación de nuevos objetivos de tratamiento y predictores biológicos.

(*Am J Psychiatry* 2014; 171:1259–1277)

## Artículos

### Un biomarcador inflamatorio predice un resultado diferencial del tratamiento de la depresión con escitalopram y nortriptilina

Rudolf Uher, M.D., Ph.D.  
Katherine E. Tansey, Ph.D.  
Tracy Dew, B.Sc.  
Wolfgang Maier, M.D.  
Ole Mors, M.D., Ph.D.  
Joanna Hauser, Ph.D.  
Mojca Zvezdana Dernovsek, M.D.  
Neven Henigsberg, M.D.  
Daniel Souery, M.D., Ph.D.  
Anne Farmer, M.D., F.R.C.Psych.  
Peter McGuffin, Ph.D., F.R.C.P.

**Objetivo:** El trastorno depresivo mayor se ha relacionado con procesos inflamatorios, pero no está claro si las diferencias individuales en los niveles de biomarcadores inflamatorios podrían ayudar a asignar a cada paciente el tratamiento que con mayor probabilidad lo beneficiaría. Los autores pusieron a prueba la hipótesis que la proteína C reactiva (CRP, por sus siglas en inglés),

un marcador normalmente disponible de la inflamación sistémica, predice una respuesta diferencial al escitalopram (un inhibidor de recaptación de serotonina) y a la nortriptilina (un inhibidor de recaptación de norepinefrina).

**Método:** La hipótesis se puso a prueba en el Estudio de Medicamentos Terapéuticos para la Depresión Basados en el Genoma (GENDEP, por sus siglas en inglés), un ensayo clínico abierto, aleatorizado y multicéntrico. Se midió la CRP con un método de alta sensibilidad en muestras de suero de 241 hombres y mujeres adultos con trastorno depresivo mayor a los que aleatoriamente se les había asignado un tratamiento de 12 semanas con escitalopram (N=115) o con nortriptilina (N=126). La medida de resultado primario fue el puntaje en la Escala de Evaluación de la Depresión de Montgomery-Åsberg (MADRS), administrada semanalmente.

**Resultados:** El nivel de CRP al inicio del estudio predijo de manera diferencial el resultado del tratamiento con los dos antidepresivos (interacción entre el medicamento y la CRP:  $\beta=3,27$ ; IC 95% $\beta=1,65$ ; 4,89). Para los pacientes con niveles bajos de CRP ( $<1$  mg/L), la mejora en el puntaje de la escala MADRS fue de 3 puntos más con escitalopram que con nortriptilina. Para los pacientes con niveles más altos de CRP, la mejora en el puntaje de la escala MADRS fue de 3 puntos más con nortriptilina que con escitalopram. La CRP y su interacción con la medicación explicó más del 10% de la varianza a nivel individual en el resultado del tratamiento.

**Conclusiones:** Un biomarcador periférico fácilmente accesible puede contribuir a la mejora de los resultados del trastorno depresivo mayor personalizando la elección de tratamiento.

(*Am J Psychiatry* 2014; 171:1278–1286)

## Identificación y réplica de un biomarcador epigenético y genético combinado que predice el suicidio y las conductas suicidas

Jerry Guintivano, Ph.D.  
Tori Brown  
Alison Newcomer, M.Sc.  
Marcus Jones  
Olivia Cox, B.Sc.  
Brion S. Maher, Ph.D.  
William W. Eaton, Ph.D.  
Jennifer L. Payne, M.D.  
Holly C. Wilcox, Ph.D.  
Zachary A. Kaminsky, Ph.D.

**Objetivo:** La identificación fiable de personas con alto riesgo de suicidio es una prioridad para la prevención del suicidio. Este estudio se llevó a cabo para identificar genes que exhiben variación epigenética asociada con el suicidio y las conductas suicidas.

**Método:** Se generaron perfiles de metilación del ADN del genoma completo

por separado en núcleos neuronales y gliales, en cerebros postmortem del Instituto Nacional de Salud Infantil y Desarrollo Humano, para detectar cómo estaban asociados con el suicidio. Se llevó a cabo una validación basada en la pirosecuenciación en tejidos corticales prefrontales en cohortes del Instituto de Investigación Médica de Stanley y del Banco de Cerebros de Harvard en el Hospital McLean y en sangre periférica de tres grupos de sujetos vivos. Se evaluaron las asociaciones funcionales con la expresión génica, el estrés y la ansiedad, y el cortisol salival.

**Resultados:** A través de la metilación del ADN se identificó una asociación epigenética y genética con el suicidio en el SNP rs7208505 dentro de la región no traducida de 3' del gen SKA2 independientemente en las tres cohortes cerebrales. Este hallazgo fue replicado con ideación suicida, en sangre de tres

cohortes de pacientes vivos. La expresión del gen SKA2 fue significativamente inferior en los muertos por suicidio y se asoció con la variación genética y epigenética del rs7208505, posiblemente mediada por la interacción con un microARN intrónico, miR-301a. Las medidas de los análisis del cortisol salival sugirieron que la variación genética y epigenética del gen SKA2 puede modular la supresión del cortisol, de acuerdo con su rol en la transactivación del receptor de glucocorticoides. El gen SKA2 interactuó significativamente con la ansiedad y el estrés para explicar alrededor del 80% de la conducta suicida y la progresión de la ideación suicida hasta el intento de suicidio.

**Conclusiones:** Estos hallazgos implican que el gen SKA2 es un nuevo objetivo genético y epigenético involucrado en la etiología del suicidio y de las conductas suicidas.

(*Am J Psychiatry* 2014; 171:1287–1296)

## Resultados clínicos y asociación del genoma completo para un sitio de metilación cerebral en un estudio de la farmacogenética de los antidepresivos en mexicano-americanos.

Ma-Li Wong, M.D.  
Chuanhui Dong, M.D., Ph.D.  
Deborah L. Flores, M.D.  
Monika Ehrhart-Bornstein, Ph.D.  
Stefan Bornstein, M.D., Ph.D.  
Mauricio Arcos-Burgos, M.D., Ph.D.  
Julio Licinio, M.D.

**Objetivo:** Los autores compararon la efectividad del tratamiento con fluoxetina y con desipramina en un estudio prospectivo, doble ciego, de farmacogenética, en mexicano-americanos de primera generación y examinaron las variaciones del papel del gen funcional de exoma completo en la respuesta de los pacientes a los antidepresivos.

**Método:** Un total de 232 mexicano-americanos que reunían los criterios del DSM-IV para trastorno depresivo mayor fueron asignados aleatoriamente para recibir 8 semanas de tratamiento doble ciego con desipramina (50–200 mg/día)

o fluoxetina (10–40 mg/día) después de un período de inducción con placebo de 1 semana. Las medidas de los resultados incluyeron la Escala de Evaluación de Depresión de Hamilton (HAM-D), la escala de Evaluación de Ansiedad de Hamilton y el Inventario de Depresión de Beck. En la semana 8, se obtuvieron datos de genotipificación del exoma completo de 36 participantes que habían remitido y de 29 que no respondieron al tratamiento.

**Resultados:** Comparado con el tratamiento con desipramina, el tratamiento con fluoxetina se asoció con una mayor reducción del puntaje HAM-D, mayores tasas de respuestas y de remisión, menor tiempo hasta la respuesta y la remisión e incidencias más bajas de los efectos secundarios anticolinérgicos y cardiovasculares. Los análisis farmacogenéticos mostraron que el exm-rs1321744 alcanzó significación a nivel del exoma completo para la remisión del tratamiento. Esta variante está ubicada en

un sitio de secuenciación de inmunoprecipitación de ADN metilado en el cerebro, lo que sugiere que puede estar implicado en la regulación epigenética de la expresión génica neuronal. Esta y otras dos variantes génicas comunes ofrecieron un modelo predictivo de validación cruzada y de alta precisión para la remisión del tratamiento de la depresión mayor (característica operativa del receptor, integral=0,95).

**Conclusiones:** Comparado con la desipramina, el tratamiento con fluoxetina mostró una reducción más rápida del puntaje de HAM-D y una menor incidencia de los efectos secundarios en una población que incluía primordialmente mexicano-americanos de primera generación con depresión mayor. El enfoque farmacogenético de este estudio implica claramente el papel de las variantes funcionales en la respuesta a un tratamiento con antidepresivos.

(*Am J Psychiatry* 2014; 171:1297–1309)



## Correlatos neurales y cognitivos de la varianza común y específica en los problemas de exteriorización en la adolescencia temprana

Natalie Castellanos-Ryan, Ph.D.  
 Maren Struve, Ph.D.  
 Robert Whelan, Ph.D.  
 Tobias Banaschewski, M.D., Ph.D.  
 Gareth J. Barker, Ph.D.  
 Arun L.W. Bokde, Ph.D.  
 Uli Bromberg, Dipl.Psych.  
 Christian Büchel, M.D.  
 Herta Flor, Ph.D.  
 Mira Fauth-Bühler, Ph.D.  
 Vincent Frouin, Ph.D.  
 Juergen Gallinat, M.D.  
 Penny Gowland, Ph.D.  
 Andreas Heinz, Ph.D.  
 Claire Lawrence, Ph.D.  
 Jean-Luc Martinot, M.D., Ph.D.  
 Frauke Nees, Ph.D.  
 Tomas Paus, M.D., Ph.D.  
 Zdenka Pausova, M.D.  
 Marcella Rietschel, M.D.  
 Trevor W. Robbins, Ph.D.  
 Michael N. Smolka, M.D.  
 Gunter Schumann, M.D., Ph.D.  
 Hugh Garavan, Ph.D.  
 Patricia J. Conrod, Ph.D.  
 The IMAGEN Consortium

**Objetivo:** Los autores tratan de modelar la varianza única y común en el

trastorno de la conducta, el abuso de sustancias, y el trastorno por déficit de atención con hiperactividad (TDAH), y de investigar los factores neurocognitivos que están relacionados, de manera general o única, con los problemas de exteriorización en la adolescencia.

**Método:** Se evaluaron medidas de personalidad y comportamentales, y respuestas en imágenes funcionales a la sensibilidad a las recompensas y a tareas de inhibición de respuestas en 1.778 adolescentes europeos a los 14 años y, utilizando la modelización de ecuaciones estructurales, dichas medidas se relacionaron con la varianza única y común en los problemas de exteriorización evaluados y modelados a los 14 y a los 16 años.

**Resultados:** Los problemas de exteriorización se ajustan a un modelo general-específico constituido por un factor específico que representa los síntomas del TDAH y del trastorno de la conducta, un factor específico que representa los síntomas del abuso de sustancias y un factor común de exteriorización que representa la varianza común compartida por todos los síntomas. La varianza común en los problemas de exteriorización se asoció con impulsividad y descuento por demora altos y por una

respuesta baja a la señal dependiente del nivel de oxígeno en la sangre (BOLD) en la substancia negra y el núcleo subtalámico, pero con una respuesta alta a la señal BOLD en el área motora presuplementaria y en el giro precentral durante la inhibición exitosa. La varianza única para el TDAH/trastorno de la conducta se asoció con impulsividad, baja inhibición de respuestas y alto descuento por demora, así como con respuesta baja a la señal BOLD en áreas cerebrales frontales bilateralmente durante la inhibición fallida. En contraste, la varianza única para el abuso de sustancia se asoció con búsqueda de sensaciones y descuento por demora altos, y con una respuesta cerebral diferencial a la anticipación de recompensas: respuesta alta a la señal BOLD en la corteza izquierda orbitofrontal, pero respuesta baja a la señal BOLD en el giro frontal inferior izquierdo.

**Conclusiones:** Los hallazgos sobre personalidad, resonancia magnética funcional y los hallazgos conductuales sugieren que las anomalías en la inhibición de respuestas, el procesamiento de errores y el procesamiento de recompensas están implicadas de forma diferencial en la vulnerabilidad subyacente específica del TDAH/trastorno de la conducta y del abuso de sustancias y general de los problemas de exteriorización.

(*Am J Psychiatry* 2014; 171:1310–1319)

## Metabolismo del glutamato en el trastorno depresivo mayor

Chadi G. Abdallah, M.D.  
 Lihong Jiang, Ph.D.  
 Henk M. De Feyter, Ph.D.  
 Madonna Fasula, A.P.R.N.  
 John H. Krystal, M.D.  
 Douglas L. Rothman, Ph.D.  
 Graeme F. Mason, Ph.D.  
 Gerard Sanacora, M.D., Ph.D.

**Objetivo:** Estudios recientes sugieren que las anomalías en la función de neurotransmisión de aminoácidos y el metabolismo energético deteriorado contribuyen a la fisiopatología subyacente del trastorno depresivo mayor. Para comprobar si el deterioro en la energética y en el ciclaje del neurotransmisor de glutamato están presentes en

la depresión mayor, utilizamos espectroscopia por resonancia magnética de carbono 13 (ERM 13C) para medir esos flujos en personas diagnosticadas con depresión mayor en relación a sujetos sanos de comparación.

**Método:** Se recogieron datos de ERM de protón (1H) y de carbono 13 (13C) de 23 individuos con depresión mayor que no tomaban medicación y 17 sujetos sanos. La ERM 1H ofreció concentraciones totales de glutamato y GABA, y la ERM 13C junto con la infusión intravenosa de glucosa [1-13C] ofreció medidas del ciclo del ácido tricarboxílico neuronal para la producción de energía mitocondrial, la síntesis de GABA, y el ciclaje de glutamato/glutamina desde voxels localizados en la corteza occipital.

**Resultados:** La producción de energía mitocondrial de la neuronas glutamatérgicas fue un 26% inferior en el grupo de depresión. Paradójicamente, no se encontró ninguna diferencia en la tasa del ciclo de glutamato/glutamina (Vcycle) Se observó una correlación significativa entre las concentraciones de glutamato y el Vcycle en la muestra general.

**Conclusiones:** La interpretación de los autores es que la reducción en producción de energía mitocondrial se debe o bien a la disfunción mitocondrial o bien a una reducción en el propio input neuronal o en la fuerza sináptica. Más estudios de ERM ayudarían a dilucidar estas posibilidades.

(*Am J Psychiatry* 2014; 171:1320–1327)

## Efectos de la depresión, la ansiedad, la comorbilidad y los antidepresivos en la frecuencia cardíaca en estado de reposo y su variabilidad: Un estudio basal de la cohorte de Brasil del estudio ELSA

Andrew H. Kemp, Ph.D.  
 Andre R. Brunoni, M.D., Ph.D.  
 Itamar S. Santos, M.D., Ph.D.  
 Maria A. Nunes, M.D., Ph.D.  
 Eduardo M. Dantas, Ph.D.  
 Roberta Carvalho de Figueiredo, Ph.D.  
 Alexandre C. Pereira, M.D., Ph.D.  
 Antonio L.P. Ribeiro, M.D., Ph.D.  
 José G. Mill, M.D., Ph.D.  
 Rodrigo V. Andreão, Ph.D.  
 Julian F. Thayer, Ph.D.  
 Isabela M. Benseñor, M.D., Ph.D.  
 Paulo A. Lotufo, M.D., Dr.P.H.

**Objetivo:** Los aumentos de la frecuencia cardíaca en estado de reposo y las disminuciones de su variabilidad están asociadas con morbilidad y mortalidad substanciales, si bien se han reportado hallazgos contradictorios para los efectos de los trastornos del ánimo y de ansiedad y de los antidepresivos. Los autores investigaron la frecuencia cardíaca y la variabilidad de la frecuencia cardíaca en una gran cohorte de Brasil, utili-

zando la ponderación del puntaje de propensión, un método relativamente nuevo, para controlar las numerosas variables de confusión potenciales.

**Método:** Se reclutaron un total de 15.105 participantes en el Estudio Longitudinal de Salud en Adultos en Brasil. Los trastornos del ánimo y de ansiedad se confirmaron utilizando la versión portuguesa del Clinical Interview Schedule–Revised. La frecuencia cardíaca y su variabilidad se extrajeron de electrocardiogramas de 10 minutos en reposo. Se realizaron regresiones ponderadas por puntajes de propensión para comparar la frecuencia cardíaca y la variabilidad de la frecuencia cardíaca entre los participantes con y sin trastornos depresivos o de ansiedad, y también entre los consumidores y no consumidores de antidepresivos.

**Resultados:** El uso de antidepresivos se asoció con aumentos de la frecuencia cardíaca y disminuciones de su variabilidad. Los efectos fueron más pronunciados para los antidepresivos tricíclicos (d

de Cohen: 0,72–0,81), seguidos de los inhibidores de recaptación de serotonina y norepinefrina (d de Cohen: 0,42–0,95) y de otros antidepresivos (de de Cohen: 0,37–0,40), en relación a los participantes que no estaban tomando antidepresivos. Solamente los participantes con trastorno de ansiedad generalizada mostraron aumentos robustos, aunque pequeños, de la frecuencia cardíaca y disminuciones de su variabilidad después de la ponderación del puntaje de propensión.

**Conclusiones:** Los resultados pueden reforzar parcialmente los hallazgos epidemiológicos de un riesgo aumentado de morbilidad y mortalidad cardiovasculares. En este estudio se controlaron muchos factores que tienen un impacto adverso en la actividad cardíaca, resaltando la importancia de las estrategias de reducción del riesgo cardiovascular. Es preciso realizar más estudios para examinar si, cómo y cuándo estos efectos contribuyen a la morbilidad y la mortalidad.

(*Am J Psychiatry* 2014; 171:1328–1334)
