# THE AMERICAN JOURNAL OF PSYCHIATRY

December 2014

Vol. 171, No. 12:1233-1352

THE AMERICAN JOURNAL OF PSYCHIATRY

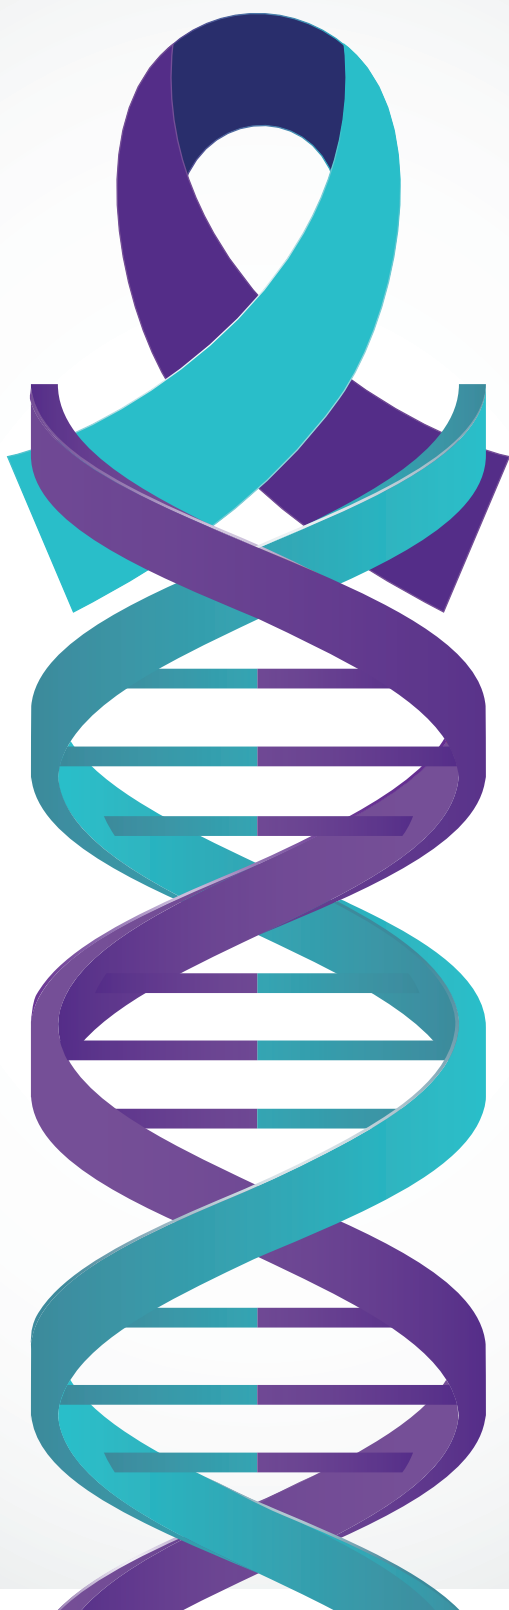

**DSM Issues: Incorporation of Biological Tests, Avoidance of Reification, and an Approach to the “Box Canyon Problem”**

Kenneth S. Kendler, M.D. 1248

**Toward a Biosignature for Suicide**

Maria A. Oquendo, M.D., et al. 1259

**An Inflammatory Biomarker as a Differential Predictor of Outcome of Depression Treatment With Escitalopram and Nortriptyline**

Rudolf Uher, M.D., Ph.D., et al. 1278

◀ **Identification and Replication of a Combined Epigenetic and Genetic Biomarker Predicting Suicide and Suicidal Behaviors**

Jerry Guintivano, Ph.D., et al. 1287

**December 2014**

**Volume 171 • Number 12**

Official Journal of the  
AMERICAN PSYCHIATRIC ASSOCIATION

[ajp.psychiatryonline.org](http://ajp.psychiatryonline.org)
