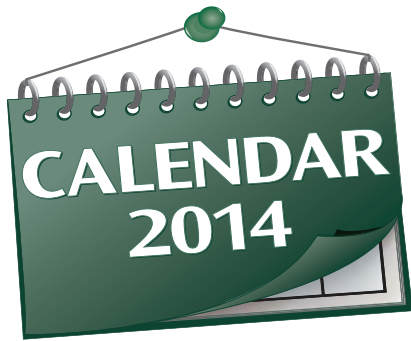

For free listing of your organization's official annual or regional meeting, please send us the following information: sponsor, location, inclusive dates, type and number of continuing education credits (if available), and the name, address, and telephone number of the person or group to contact for more information. In order for an event to appear in our listing, all notices and changes must be received at least 6 months in advance of the meeting and should be addressed to:

**Calendar, American Journal of Psychiatry, 1000 Wilson Boulevard, Suite 1825, Arlington, VA 22209-3901, [swestrat@psych.org](mailto:swestrat@psych.org) (e-mail).**

Because of space limitations, only listings of meetings of the greatest interest to Journal readers may be included.

## FEBRUARY 2015

**February 11–15**, 20th Annual Psychopharmacology Update from. Paris Hotel, Las Vegas, Nevada. Sponsored by The Nevada Psychiatric Association. Contact: (877) 493-0007 (phone); [www.nvpsychiatry.org](http://www.nvpsychiatry.org) (web site).

**February 16–19**, Update on Psychiatry: Continuing a Proud 23 Year Tradition. JW Marriott Starr Pass Resort, Tucson, Arizona. Sponsored

by: Univ. of Arizona College of Medicine, Department of Psychiatry; Arizona Psychiatric Society; Arizona Psychological Association. Contact: [uapsycon@email.arizona.edu](mailto:uapsycon@email.arizona.edu) (e-mail); (520) 626-1392 (phone); [www.psychopharm.arizona.edu](http://www.psychopharm.arizona.edu) (web site).

## MARCH 2015

**March 25–28**, 26th Annual Meeting, American Neuropsychiatric

Association, Lake Buena Vista, FL. [www.anpaonline.org](http://www.anpaonline.org) (web site).

## MAY 2015

**May 16–20**, 168th Annual Meeting, American Psychiatric Association, Toronto, Ontario, Canada. Contact: APA Annual Meetings Dept., 1000 Wilson Blvd, Suite 1825, Arlington, VA 22209; (703) 907-7815 (tel); <http://annualmeeting.psychiatry.org/> (web site).

# An essential digital companion to the DSM-5®

*NEW! – Now Spanish language supported!*

## DSM-5® Diagnostic Criteria Mobile App

American Psychiatric Association

The **DSM-5® Diagnostic Criteria Mobile App** is designed to help mental health practitioners, researchers and students fully integrate the new DSM criteria and codes into their practice and study. Users have full offline access to all of the criteria sets as well as online access to supporting videos, commentary and resources. Powerful search and customization tools aid and enhance assessment of symptom presentations in a variety of clinical and administrative settings. It features:

- Access to the complete DSM-5® diagnostic criteria sets on your phone and tablet
- Up to date access to ICD-9-CM and ICD-10-CM codes for clinical and administrative use
- Video commentary from the DSM-5 task force members highlighting changes from DSM-IV to DSM-5
- Robust disorder, acronym, code and symptom search functionality
- Bookmarking allows customization of the criteria sets most commonly referenced

Available for both iOS and Android compatible devices through the iTunes store and Google Play.

As the DSM-5® Diagnostic Criteria Mobile App is only available for sale through the iTunes and Android stores, it is not possible for us to extend our traditional APA Member or APA Resident-Fellow Member discounts on the purchase of this product.

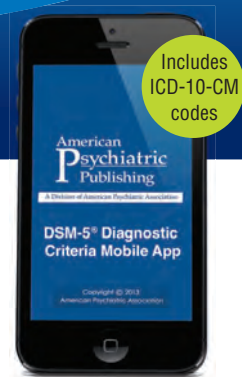

# THE AMERICAN PSYCHIATRIC ASSOCIATION

1000 Wilson Blvd., Suite 1825, Arlington, VA 22209-3901  
(888) 357-7924 (toll-free inside the U.S. and Canada) / (703) 907-7300  
web site: [www.psychiatry.org](http://www.psychiatry.org) • e-mail: [apa@psych.org](mailto:apa@psych.org)

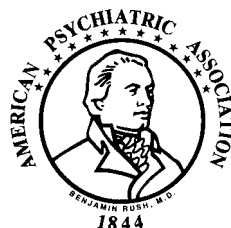

## OFFICERS 2014–2015

|                 |                        |
|-----------------|------------------------|
| President       | Paul Summergrad, M.D.  |
| President-Elect | Renée L. Binder, M.D.  |
| Treasurer       | Frank W. Brown, M.D.   |
| Secretary       | Maria A. Oquendo, M.D. |

## ASSEMBLY

|               |                                   |
|---------------|-----------------------------------|
| Speaker       | Jenny L. Boyer, M.D., Ph.D., J.D. |
| Speaker-Elect | Glenn A. Martin, M.D.             |
| Recorder      | Daniel J. Anzia, M.D.             |

## OFFICE OF THE CEO AND MEDICAL DIRECTOR

CEO and Medical Director     Saul Levin, M.D., M.P.A.

## BOARD OF TRUSTEES

|                         |                                 |                        |
|-------------------------|---------------------------------|------------------------|
| Jeffrey Akaka, M.D.     | Jeffrey L. Geller, M.D., M.P.H. | John M. Oldham, M.D.   |
| R. Scott Benson, M.D.   | Dilip V. Jeste, M.D.            | Vivian B. Pender, M.D. |
| Lara J. Cox, M.D., M.S. | Judith F. Kashtan, M.D.         | Gail E. Robinson, M.D. |
| Brian Crowley, M.D.     | Jeffrey A. Lieberman, M.D.      | Ravi N. Shah, M.D.     |
| Anita S. Everett, M.D.  | Molly K. McVoy, M.D.            | Melinda Young, M.D.    |

## PUBLISHER

Rebecca D. Rinehart

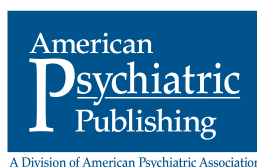

The American Journal of Psychiatry is online at [ajp.psychiatryonline.org](http://ajp.psychiatryonline.org)

# THE AMERICAN PSYCHIATRIC ASSOCIATION

## Chairpersons of Councils, Commissions, Committees, and Task Forces

### Standing Committees

**Bylaws**

Rebecca W. Brendel, M.D., J.D.

**Elections**

Barry K. Herman, M.D.

**Ethics**

Richard D. Milone, M.D.

**Finance and Budget**

Alan F. Schatzberg, M.D.

**Audit**

Frank W. Brown, M.D.

**Investment Oversight**

David Fassler, M.D.

**Joint Reference**

Renée L. Binder, M.D.

**Membership**

Rahn K. Bailey, M.D.

**Nominating**

Jeffrey A. Lieberman, M.D.

**Tellers**

Hind Benjelloun, M.D.

**Council on Addiction Psychiatry**

Frances R. Levin, M.D.

**Council on Advocacy and Government Relations**

Barry B. Perlman, M.D.

*Advocacy and Litigation Funding*

Jack Drescher, M.D.

*Caucus of State Hospital Psychiatrists**Caucus of VA Psychiatrists***Council on Children, Adolescents, and Their Families**

Louis J. Kraus, M.D.

*Agnes Purcell McGavin Award*

Christopher J. McDougale, M.D.

*Blanche F. Ittleson Research Award**Caucus of Psychiatrists Treating Persons With Intellectual Disabilities**College Mental Health Caucus***Council on Communications**

Raymond J. DePaulo, M.D.

**Council on Geriatric Psychiatry**

Robert P. Roca, M.D.

**Council on Healthcare Systems and Financing**

Harsh K. Trivedi, M.D.

*Reimbursement for Psychiatric Care*

Bruce J. Schwartz, M.D.

*RBRVS, Codes and Reimbursement*

Ronald M. Burd, M.D.

**Council on International Psychiatry**

Dilip V. Jeste, M.D.

*Caucus on Global Mental Health and Psychiatry***Council on Medical Education and Lifelong Learning**

Richard F. Summers, M.D.

*APA Public Psychiatry Fellowship Selection Committee*

Christina V. Mangurian, M.D.

*APA/SAMHSA Minority Fellowship Selection and Advisory*

Altha J. Stewart, M.D.

*Caucus on MOC Issues**Caucus of Resident-Fellow Members**Scientific Program*

Philip R. Muskin, M.D.

*Scientific Program Committee of the Institute on Psychiatric Services*

Hunter L. McQuiston, M.D.

*Subcommittee on Joint Sponsorship of Continuing Medical Education (CME)**Vestermark Award Committee*

Jonathan F. Borus, M.D.

**Council on Minority Mental Health and Health Disparities**

Sandra C. Walker, M.D.

*Caucus of Rural Psychiatrists**Caucus on Religion, Spirituality and Psychiatry***Council on Psychiatry And Law**

Steven K. Hoge, M.D.

*Caucus of Correctional Psychiatrists**Isaac Ray/Human Rights Award*

Mardoche Sidor, M.D.

*Judicial Action*

Paul S. Appelbaum, M.D.

*Manfred S. Guttmacher Award*

David A. Lowenthal, M.D.

**Council on Psychosomatic Medicine (Consultation Liaison Psychiatry)**

David F. Gitlin, M.D.

**Council on Quality Care**

Joel Yager, M.D.

*Mental Health Information Technology*

Steven Roy Daviss, M.D.

*Steering Committee on Practice Guidelines*

Michael J. Vergare, M.D.

**Council on Research**

Dwight L. Evans, M.D.

*Caucus of Psychiatrists Treating Persons with Eating Disorders**Caucus on Alternative and Complementary Medicine**Psychiatric Dimensions of Disasters*

Charles R. Marmar, M.D.

*Research Awards*

B. Timothy Walsh, M.D.

*Task Force to Revise the Practice of Electroconvulsive Therapy*

# There's So Much More to AJP Than Meets the Page!

Visit *The American Journal of Psychiatry's* website on PsychiatryOnline for the following features!

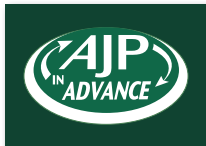

## AJP in Advance

The very latest research advances!

At **AJP in Advance**, you can discover the following before their appearance in print:

### Electroconvulsive Therapy Augmentation in Clozapine-Resistant Schizophrenia

Novel treatments for schizophrenia are needed, particularly for treatment-resistant forms of the disorder, and ECT may be a safe and viable option for patients who fail to adequately respond to clozapine.

### Cross-Disorder Genome-Wide Analyses Suggest a Complex Genetic Relationship Between Tourette's Syndrome and OCD

An effort to map shared and disorder-specific molecular correlates using a genome-wide-association study approach led to suggestive findings and provides guidance for other studies that examine the molecular genetic contributions of co-disorder familial aggregation, such as with tic disorders and obsessive compulsive disorder.

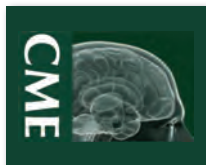

## AJP CME

Three articles in this issue form the basis of a short course with questions that can be answered for up to 1 *AMA PRA Category 1 Credit™* each by visiting <http://psychiatryonline.org/cme.aspx> and clicking on the "American Journal of Psychiatry" tab. CME credit is issued only **online**, and a paid subscription to AJP CME course program is required. This month's courses appear on pages 1349–1352.

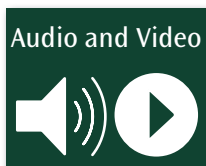

## Have You Heard?

With AJP Audio you can listen to highlights of this issue. This month, Deputy Editor Susan K. Schultz, M.D., discusses neuropsychiatric presentations of mercury poisoning, the effect of antidepressants on heart rate, a combined epigenetic and genetic biomarker for suicide, a marker of inflammation that predicts differences in outcome of treatment with escitalopram and nortriptyline, and how to incorporate biological tests into psychiatric diagnostic criteria. Also, visit the online edition of this month's Journal and click "In This Issue" to view a video of Deputy Editor Daniel S. Pine, M.D., presenting highlights from the issue.

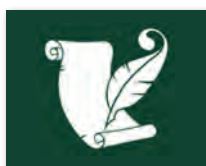

## Revisit the Journal's rich history!

### 25 years ago this month: Sabelli and Sabelli on Process Theory

"Process theory is a comprehensive theory of physical and psychological processes that can serve to integrate biological, social, and psychodynamic psychiatry.... It provides three novel and clinically applicable concepts: 1) biological priority and psychological supremacy (as contrasted to theories of biological or psychological primacy), 2) union of opposites (as contrasted to psychoanalytic and dialectic conflicts and to systems homeostasis), and 3) creative bifurcations (as contrasted to determinism and developmental theories)."

### 50 years ago this month: Thomas Szasz on "The Moral Dilemma of Psychiatry"

Here, Szasz, who by 1964 had already written extensively, and critically, on psychiatry's role in society, argues that, "As science, psychiatry is the study of communicative behavior, and, as therapy, the practice of dialectic and rhetoric (and of social control). The principal roles of the contemporary psychiatrist are: moralist, rhetorician, and scientist (and agent of social control); and rarely, physician.... The basic moral dilemma of psychiatry is generated by the conflict between the self and the other." Although some of Szasz's essential premises have been undermined by advances in brain science, his rich and wide-ranging essay remains thought-provoking today.

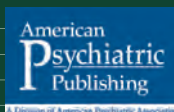

[ajp.psychiatryonline.org](http://ajp.psychiatryonline.org)

[www.appi.org](http://www.appi.org) • 1-800-368-5777 • Fax: 703-907-1091 • Email: [appi@psych.org](mailto:appi@psych.org)

Psychiatry Today 4R11231

# The Residents' JOURNAL

## THE AMERICAN JOURNAL OF PSYCHIATRY RESIDENTS' JOURNAL

November 2014

Volume 9

Issue 11

### Inside

- 2 **Promise and Progress in Women's Mental Health**  
Kathleen Mary Patchan, M.D.  
Associate Editor
- 3 **Psychiatric Comorbidities in Breast Cancer and Gynecologic Malignancies**  
Teofilo Matos Santana, M.D.
- 6 **Suicide Risk Assessment During Pregnancy and the Postpartum Period**  
Jessica L. Coker, M.D.
- 9 **Postpartum Psychosis: A True Psychiatric Emergency**  
Meesha Ahuja, M.D.
- 11 **A Case of Obsessive-Compulsive Disorder in Pregnancy and the Postpartum Period**  
Tara Malekshahi, M.D.
- 13 **Comorbid Psychiatric Disorders During Menopause**  
Pochu Ho, M.D.
- 16 **Complications of Anorexia Nervosa: Management of Acute Gastric Distention**  
Gendalynne C. Mooneyham, M.D., M.S.  
Lorraine Myers, M.D.
- 19 **Residents' Resources**

### In This Issue

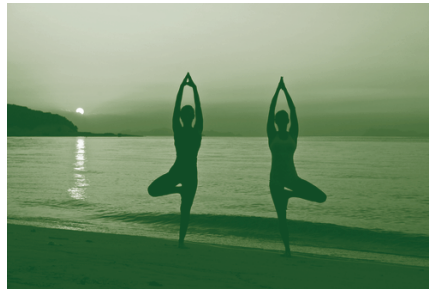

This issue of the *Residents' Journal* focuses on the topic of women's mental health and wellness. Teofilo Matos Santana, M.D., presents data on psychiatric comorbidities in breast and gynecologic cancers. Jessica L. Coker, M.D., examines suicide risk during pregnancy and the postpartum period and provides information on prevalence, risk factors, and management. In one case report, Meesha Ahuja, M.D., discusses postpartum psychosis in a young woman with a history of bipolar disorder, emphasizing the need for psychiatrists to be cognizant of risk factors in the perinatal population. In another case report, Tara Malekshahi, M.D., describes a woman with obsessive-compulsive disorder before, during, and after pregnancy whose symptoms decreased with sertraline and weekly cognitive-behavioral therapy sessions. In a review article, Pochu Ho, M.D., discusses comorbid psychiatric disorders during menopause, outlining underlying mechanisms and treatments. Lastly, Gendalynne C. Mooneyham, M.D., M.S., and Lorraine Myers, M.D., present a treatment in psychiatry article on the complex psychiatric disorder of anorexia nervosa and provide important data on evaluation and management.

Editor-in-Chief  
**Misty Richards, M.D., M.S.**  
Senior Deputy Editor  
**Rajiv Radhakrishnan, M.B.B.S., M.D.**  
Deputy Editor  
**Tobias Wasser, M.D.**  
Guest Section Editor  
**Kathleen Mary Patchan, M.D.**

Associate Editors  
**Ijeoma Chukwu, M.D., M.P.H.**  
**Kathleen Mary Patchan, M.D.**

Media Editor  
**Holly S. Peek, M.D., M.P.H.**  
Staff Editor  
**Angela Moore**

Editors Emeriti  
**Sarah B. Johnson, M.D.**  
**Molly McVey, M.D.**  
**Joseph M. Cerimelo, M.D.**  
**Sarah M. Fayad, M.D.**  
**Manifa Seawell, M.D.**  
**Arshya Vahabzadeh, M.D.**

### Editor-in-Chief

Misty Richards, M.D., M.S.

### Senior Deputy Editor

Rajiv Radhakrishnan, M.B.B.S., M.D.

### Deputy Editor

Tobias Wasser, M.D.

### Associate Editors

Ijeoma Chukwu, M.D., M.P.H.

Kathleen Mary Patchan, M.D.

### Media Editor

Holly S. Peek, M.D., M.P.H.

*The Residents' Journal* accepts manuscripts authored by medical students, resident physicians, and fellows. To submit your paper, please visit the manuscript submission site at [mc.manuscriptcentral.com/appi-ajp](http://mc.manuscriptcentral.com/appi-ajp) and either create an account or use your existing account. For manuscript type, select "Residents." Then follow the instructions to upload your manuscript. Residents who are interested in participating as Guest Section Editors should e-mail *The Residents' Journal* Editor-in-Chief Misty Richards at [misty.richards@gmail.com](mailto:misty.richards@gmail.com).

*The Residents' Journal* is sent free-of-charge to all psychiatry residents. Anyone interested in being included on the distribution list should contact Angela Moore, *The Residents' Journal* staff editor at [ajp@psych.org](mailto:ajp@psych.org) with "Subscribe to Residents' Journal" in the subject line.

To access the complete Residents' Journal archives, visit [ajp.psychiatryonline.org/residents\\_journal.aspx](http://ajp.psychiatryonline.org/residents_journal.aspx)

## Contents

- A17 Editorial Board  
A19 Highlights of this issue

## Editorial

- 337 **Carving bipolarity using a lithium sword**  
G. S. Malhi and J. R. Geddes

- 339 **Out-patient institutionalisation – in 100 words**  
Nicholas Kontos, Oliver Freudenreich and John Querques

## Review articles

- 340 **Low birth weight, preterm birth and small for gestational age association with adult depression: systematic review and meta-analysis**  
C. Loret de Mola, G. V. Araújo de França, L. A. Quevedo and B. L. Horta
- 348 **Height in relation to dementia death: individual participant meta-analysis of 18 UK prospective cohort studies**  
T. C. Russ, M. Kivimäki, J. M. Starr, E. Stamatakis and G. D. Batty

## Papers

- 355 **Fetal growth and psychiatric and socioeconomic problems: population-based sibling comparison**  
Q. A. Class, M. E. Rickert, H. Larsson, P. Lichtenstein and B. M. D'Onofrio
- 362 **Functional impairment in adolescents and young adults with emerging mood disorders**  
J. Scott, E. M. Scott, D. F. Hermens, S. L. Naismith, A. J. Guastella, D. White, B. Whitwell, J. Lagopoulos and I. B. Hickie
- 369 **Hippocampal abnormalities and age in chronic schizophrenia: morphometric study across the adult lifespan**  
N. Pujol, R. Penadés, C. Junqué, I. Dinov, C. H. Y. Fu, R. Catalán, N. Ibarretxe-Bilbao, N. Bargalló, M. Bernardo, A. Toga, R. J. Howard and S. G. Costafreda

- 375 **C. W. Beers, *A Mind That Found Itself* – reflection**  
Pippa Jones

- 376 **Default mode network subsystem alterations in obsessive-compulsive disorder**  
J. C. Beucke, J. Sepulcre, M. C. Eldaief, M. Sebold, N. Kathmann and C. Kaufmann

- 382 **Asylum – no more – poems by doctors**  
Reg Parton

- 383 **Trauma, post-traumatic stress disorder and psychiatric disorders in a middle-income setting: prevalence and comorbidity**  
S. Dorrington, H. Zavos, H. Ball, P. McGuffin, F. Rijdsdijk, S. Siribaddana, A. Sumathipala and M. Hotopf

- 389 **The crooked wisdom of Francis Bacon's *Essays* – reflection**  
Alistair Stewart

- 390 **Assessing outcomes for cost-utility analysis in depression: comparison of five multi-attribute utility instruments with two depression-specific outcome measures**  
C. Mihalopoulos, G. Chen, A. Iezzi, M. A. Khan and J. Richardson

- 398 **Determinants of completed railway suicides by psychiatric in-patients: case-control study**  
K. Lukasczek, J. Baumert, M. Krawitz, N. Erazo, H. Förstl and K.-H. Ladwig

## Short report

- 407 **Misuse of benzodiazepines and Z-drugs in the UK**  
V. Kapil, J. L. Green, C. Le Lait, D. M. Wood and P. I. Dargan

## Columns

- 409 Correspondence  
412 Corrections  
413 Book reviews  
417 Contents of *Advances in Psychiatric Treatment*  
418 Contents of the *American Journal of Psychiatry*  
419 Kaleidoscope  
421 From the Editor's desk

## Cover picture

Sayda Abdul Rashid (b. 1979).  
*Sunshine Merridale* (2012)

I paint abstract and contemporary art. I am very spiritual and have a strong faith in God. I was given a diagnosis of bipolar disorder following a breakdown I had in Poland during April 1997. Ever since this episode I have painted pictures relating to my spiritual experiences. My paintings are personal and very much like a diary. My paintings always tell a story. This painting illustrates the theme of happiness and hope. The colours evoke a bright mood. There is a lady sitting on the left side of the picture. Once she was miserable, but she has now found happiness in 'Merridale'. She is at peace and the doors of her life have opened into a new beginning. The flower pots symbolise identity and personal growth.

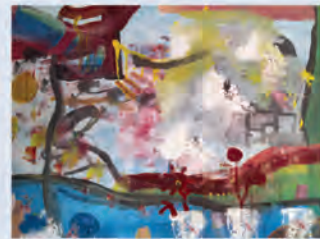

We are always looking for interesting and visually appealing images for the cover of the *Journal* and would welcome suggestions or pictures, which should be sent to Dr Allan Beveridge, British Journal of Psychiatry, 21 Prescot Street, London E1 8BB, UK or [bjp@rcpsych.ac.uk](mailto:bjp@rcpsych.ac.uk).

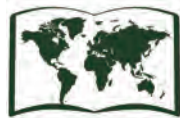

# SHARP

Shanghai Archives of Psychiatry · Since 1959

上海精神医学

WWW.SHANGHAIARCHIVESOFPSYCHIATRY.ORG

OCTOBER 2014 • VOL. 26 • NO. 5

## IN THIS ISSUE

doi: <http://dx.doi.org/10.3969/j.issn.1002-0829.214156>

## SYSTEMATIC REVIEW

**Appraisal of the methodological quality and summary of the findings of systematic reviews on the relationship between SSRIs and suicidality**

Wei LI, Yumei WAN, Juanjuan REN, Ting LI, Chunbo LI

doi: <http://dx.doi.org/10.3969/j.issn.1002-0829.214080>

## META-ANALYSIS

**Prevalence of antisocial personality disorder among Chinese individuals receiving treatment for heroin dependence: a systematic review**

Baoliang ZHONG, Yutao XIANG, Xiaolan CAO, Yan LI, Junhong ZHU, Helen F. K. CHIU

doi: <http://dx.doi.org/10.3969/j.issn.1002-0829.214091>

## ORIGINAL ARTICLES

**Randomized controlled trial of adjunctive EEG-biofeedback treatment of obsessive compulsive disorder**

Xiaopeng DENG, Gaohua WANG, Lifang ZHOU, Xinfeng ZHANG, Mei YANG, Gangya HAN, Zheming TU, Bo LIU

doi: <http://dx.doi.org/10.3969/j.issn.1002-0829.214067>

**Cross-sectional study of the association of cognitive function and hippocampal volume among healthy elderly adults**

Lijuan JIANG, Yan CHENG, Qingwei LI, Yingying TANG, Yuan SHEN, Ting LI, Wei FENG, Xinyi CAO, Wenyuan WU, Jijun WANG, Chunbo LI

doi: <http://dx.doi.org/10.3969/j.issn.1002-0829.214036>

**Case control study of association between the ANK3 rs10761482 polymorphism and schizophrenia in persons of Uyghur nationality living in Xinjiang China**

Xianjiang ZHONG, Lili ZHANG, Shuxian HAN, Xiao LUO, Zhiguo AN, Qizhong YI

doi: <http://dx.doi.org/10.3969/j.issn.1002-0829.214033>

## FORUM

**Should major depressive disorder with mixed features be classified as a bipolar disorder?**

Xiaohua LIU, Kaida JIANG

doi: <http://dx.doi.org/10.3969/j.issn.1002-0829.214146>

## CASE REPORT

**Case report on Tourette syndrome treated successfully with aripiprazole**

M.S. BHATIA, Priyanka GAUTAM, Jaswinder KAUR

doi: <http://dx.doi.org/10.3969/j.issn.1002-0829.214120>

## RESEARCH METHODS IN PSYCHIATRY

**Internal consistency and test-retest reliability of the Chinese version of the 5-item Duke University Religion Index**

Hanhui CHEN, Zhizhong WANG, Michael R. PHILLIPS, Yanli SUN, Hui G. CHENG

doi: <http://dx.doi.org/10.3969/j.issn.1002-0829.214088>

## BIOSTATISTICS IN PSYCHIATRY (23)

**Rank regression: an alternative regression approach for data with outliers**

Tian CHEN, Wan TANG, Ying LU, Xin TU

doi: <http://dx.doi.org/10.3969/j.issn.1002-0829.214148>
